# Supplementary material for: Feline Leishmaniosis in Northwestern Italy: Current Status and Zoonotic Implications
Source: MDPI journal article supplement (doi:10.3390/vetsci8100215), 2021-10-02
Supplement: s1 [file s1]

## Supporting Material

---

### **Feline Leishmaniosis in Northwestern Italy: Current Status and Implications**

Ehab Kotb Elmahallawy <sup>1,2,3\*</sup>, Stefania Zanet <sup>3</sup>, Marco Poggi <sup>3</sup>, Khalaf F Alsharif <sup>4</sup>, Ahmad Agil <sup>2</sup>, Anna Triscioglio <sup>3</sup> and Ezio Ferroglio <sup>3</sup>

---

**Table S1.** The full details of the study cohort for each of the enrolled cat's sex, age, breed and living habits.

| Enrolled cats |                      |     |
|---------------|----------------------|-----|
| Sex           | M                    | 31  |
|               | M neutered           | 176 |
|               | F                    | 27  |
|               | F spayed             | 112 |
| Age           | 12-36 months         | 114 |
|               | 3 - 10 yrs           | 178 |
|               | ≥10 yrs              | 54  |
| Breed         | European             | 315 |
|               | British Short Hair   | 7   |
|               | Maine Coon           | 12  |
|               | Norwegian Forest Cat | 3   |
|               | Persian              | 9   |
| Living habits | Inside only          | 163 |
|               | Nights outside       | 59  |
|               | Outside only         | 124 |
